# Supplementary material for: On-Demand Service Platforms
Source: Atypon-hosted journal article supplement (doi:10.1287/msom.2017.0678), 2018-07-23
Supplement: msom.2017.0678-sm.pdf [file msom.2017.0678-sm.pdf]

## Online Supplement

This supplement addresses the setting where there is uncertainty in both customers' valuations and agents' opportunity costs. For convenience, we replace the upper-case superscripts on  $K^H$  and  $K^L$  with lower-case superscripts:  $K^h = k + \Delta$  and  $K^l = k - \Delta$ . For simplicity, we suppose that the correlation of any pair  $\{i, j\} \in \{1, \dots, \bar{N}\}^2$ , where  $i \neq j$ , of agents' opportunity costs  $\text{Corr}(\hat{K}_i, \hat{K}_j) = 1$ , which implies  $\hat{K}_i = \hat{K}_j$ . Accordingly, we drop the subscript on  $\hat{K}$ . For further simplicity, we suppose that in one state of the world (when the weather is "bad") all customers have valuation  $V^h$  and all agents have opportunity cost  $K^h$ , and in the other state of the world (when the weather is "good") all customers have valuation  $V^l$  and all agents have opportunity cost  $K^l$ . More precisely,  $(\hat{V}, \hat{K}) = (V^h, K^h)$  and  $(\hat{V}, \hat{K}) = (V^l, K^l)$  with equal probability. Let  $\pi^a = r^a - \bar{N}k$  and  $\pi^j = [r^j - \bar{N}K^j]/2$ , where  $r^a = \max_{p \geq 0} \{p \sum_{j \in \{h, l\}} \lambda(V^j, p, \bar{N})/2\}$  and  $r^j = \max_{p \geq 0} \{p \lambda(V^j, p, \bar{N})\}$  for  $j \in \{h, l\}$ . The definitions of  $p^a$  and  $p^h$  provided prior to Lemma A2 imply that  $p^a \in \arg \max_{p \geq 0} \{p \sum_{j \in \{h, l\}} \lambda(V^j, p, \bar{N})/2\}$  and  $p^h \in \arg \max_{p \geq 0} \{p \lambda(V^h, p, \bar{N})\}$ . We abuse notation by defining  $p^l \in \arg \max_{p \geq 0} \{p \lambda(V^l, p, \bar{N})\}$ . Let  $\delta^L = \sup\{\delta : \pi^l \geq \pi^h, \delta \in [0, v]\}$  and  $\Delta^a = (2r^a - r^l)/\bar{N} - k$ . Note  $\lim_{\delta \rightarrow 0} \Delta^a = r/\bar{N} - k$ , where  $r = \max_{p \geq 0} \{p \lambda(v, p, \bar{N})\}$ .

**Lemma B1** *In the firm-employee business model, the firm's optimal price  $p_I^* = p^a$  and the firm activates  $\bar{N}$  employee-agents. The firm activates at least one agent for any realized customers' valuation and agents' opportunity cost  $(V, K)$  only if  $K^h < p^a \lambda(V^h, p^a, \bar{N})/\bar{N}$ . Further,  $\delta^L > 0$ . Suppose  $\delta < \delta^L$ ; then  $\pi^l > \pi^h$ ; and further, the firm activates at least one agent for any realized  $(V, K)$  if and only if  $\Delta < \Delta^a$ .*

**Proof of Lemma B1:** After setting price  $p$  and observing realized valuation and opportunity cost  $(V^j, K^j)$  where  $j \in \{h, l\}$ , the firm's employee-agent activation problem is  $\max_{n \in \{0, 1, \dots, \bar{N}\}} \{p \lambda(V^j, p, n) - nK^j\}$ . Because  $\lambda(V^j, p, n)/n$  strictly increases with  $n$  (by Lemma A1a),

$$\arg \max_{n \in \{0, 1, \dots, \bar{N}\}} \{p \lambda(V^j, p, n) - nK^j\} = \begin{cases} \bar{N} & \text{if } K^j < p \lambda(V^j, p, \bar{N})/\bar{N} \\ 0 & \text{otherwise.} \end{cases}$$

If

$$K^j \geq p \lambda(V^j, p, \bar{N})/\bar{N}, \quad (41)$$

then it is optimal for the firm to activate zero agents. Because, by assumption, the firm activates at least one agent for any realized  $(V, K)$ , this implies that there exists  $p \geq 0$  such that

$$K^i < p \lambda(V^i, p, \bar{N})/\bar{N} \quad (42)$$

and that the optimal  $p$  satisfies (42) for  $i = h$  and  $i = l$ . If  $p$  satisfies (42) for  $i = h$  and  $i = l$ , then the firm's objective function simplifies to  $\pi^a(p) = p \sum_{j \in \{h, l\}} \lambda(V^j, p, \bar{N})/2 - \bar{N}k$ , which is maximized at  $p = p^a$ , yielding expected profit rate  $\pi^a$ . If  $p$  satisfies (41) for  $j \in \{h, l\}$  and (42) for  $i \in \{h, l\}$

where  $i \neq j$ , then the firm's objective function simplifies to  $\pi^i(p) = [p\lambda(V^i, p, \bar{N}) - \bar{N}K^i]/2$ , which is maximized at  $p = p^i$ , yielding expected profit rate  $\pi^i$ . Thus, our assumption that the firm activates at least one agent for any realized  $(V, K)$  is satisfied if and only if  $\pi^a > \max\{\pi^j\}_{j \in \{h, l\}}$ . We next show that  $\delta^L > 0$  and that for  $\delta \in [0, \delta^L)$ ,  $\pi^l > \pi^h$ . As  $\delta \rightarrow 0$ ,  $\pi^j \rightarrow [r - \bar{N}K^j]/2$  for  $j \in \{h, l\}$  and  $\pi^h - \pi^l \rightarrow -\bar{N}\Delta < 0$ . Therefore that  $\delta^L > 0$  follows from  $\pi^h$  and  $\pi^l$  being continuous in  $\delta$ . For the remainder of the proof, suppose  $\delta < \delta^L$ . Because  $\pi^h$  strictly increases and  $\pi^l$  strictly decreases with  $\delta$ , this implies  $\pi^l > \pi^h$ . Further,  $\pi^a > \pi^l$  if and only if  $\Delta < \Delta^a$ . Therefore,  $\pi^a > \max\{\pi^j\}_{j \in \{h, l\}}$  if and only if  $\Delta < \Delta^a$ . ■

**Lemma B2** *There exists  $\Delta^l \in [0, k]$  such that if  $\delta < \delta^L$  and  $\Delta > \Delta^l$ , then the platform's optimal price  $p^* = p^l$ . Further,  $\lim_{\delta \rightarrow 0} \Delta^l = \min(k, (r/\bar{N} - k)/3)$ .*

**Proof of Lemma B2:** We first characterize how many agents participate in equilibrium under various wages, prices and realized valuations and opportunity costs. Let  $(\underline{j}(p), \bar{j}(p)) \in \{h, l\}^2$  denote the solution to  $K^{\underline{j}(p)}/\lambda(V^{\underline{j}(p)}, p, \bar{N}) \leq K^{\bar{j}(p)}/\lambda(V^{\bar{j}(p)}, p, \bar{N})$  and  $\underline{j}(p) \neq \bar{j}(p)$ . If price  $p < V^l$  and wage  $\omega \geq \bar{N}K^{\bar{j}(p)}/\lambda(V^{\bar{j}(p)}, p, \bar{N})$ , then  $\bar{N}$  agents participate. If  $p < V^{\underline{j}(p)}$  and  $K^{\underline{j}(p)}/\lambda(V^{\underline{j}(p)}, p, \bar{N}) \leq \omega < K^{\bar{j}(p)}/\lambda(V^{\bar{j}(p)}, p, \bar{N})$ , then  $\bar{N}$  agents participate if  $(V, K) = (V^{\underline{j}(p)}, K^{\underline{j}(p)})$ , and no agents participate otherwise. Otherwise, no agents participate. Consequently, we can restrict attention to two wages  $\omega \in \{K^j/\lambda(V^j, p, \bar{N})\}_{j \in \{\underline{j}(p), \bar{j}(p)\}}$ . Under  $\omega = K^{\underline{j}(p)}/\lambda(V^{\underline{j}(p)}, p, \bar{N})$ , the platform's objective function simplifies to  $\pi^{\underline{j}(p)}(p) = [p\lambda(V^{\underline{j}(p)}, p, \bar{N}) - \bar{N}K^{\underline{j}(p)}]/2$ , which is maximized at  $p = p^{\underline{j}(p)}$ , yielding expected profit rate  $\pi^{\underline{j}(p)}$ . Under  $\omega = K^{\bar{j}(p)}/\lambda(V^{\bar{j}(p)}, p, \bar{N})$ , the platform's objective function simplifies to  $\pi^m(p) = [p - \bar{N}K^{\bar{j}(p)}/\lambda(V^{\bar{j}(p)}, p, \bar{N})]\sum_{j \in \{h, l\}} \lambda(V^j, p, \bar{N})/2$ . Let  $p^m \in \arg \max_{p \geq 0} \pi^m(p)$  and  $\pi^m = \pi^m(p^m)$ . Therefore, if  $\pi^l > \max\{\pi^j\}_{j \in \{h, m\}}$ , then the platform's optimal price  $p^* = p^l$ . Let  $\bar{\pi}^m(p) = [p - \bar{N}K^h/\lambda(V^h, p, \bar{N})]\sum_{j \in \{h, l\}} \lambda(V^j, p, \bar{N})/2$ ,  $\bar{p}^m \in \arg \max_{p \geq 0} \bar{\pi}^m(p)$  and  $\bar{\pi}^m = \bar{\pi}^m(\bar{p}^m)$ . Because  $K^{\bar{j}(p)}/\lambda(V^{\bar{j}(p)}, p, \bar{N}) \geq K^h/\lambda(V^h, p, \bar{N})$ ,  $\bar{\pi}^m \geq \pi^m$ . Because  $\bar{\pi}^m$  strictly decreases and  $\pi^l$  strictly increases with  $\Delta$ , there exists  $\Delta^l \in [0, k]$  such that  $\pi^l > \bar{\pi}^m$  if and only if  $\Delta > \Delta^l$ . As  $\delta \rightarrow 0$ ,  $\bar{\pi}^m \rightarrow r - \bar{N}K^h$  and  $\pi^l \rightarrow (r - \bar{N}K^l)/2$ , so  $\Delta^l \rightarrow \min(k, (r/\bar{N} - k)/3)$ . Because  $\pi^l > \pi^h$  for  $\delta < \delta^L$  (by Lemma B1), if  $\delta < \delta^L$  and  $\Delta > \Delta^l$ , then  $\pi^l > \max\{\pi^j\}_{j \in \{h, m\}}$ . ■

**Proposition B1** *There exists  $\delta^l > 0$  and  $\Delta^l \in [0, k]$  such that: if  $\delta < \delta^l$  and  $\Delta > \Delta^l$ , then agent independence decreases the optimal price  $p^* < p_I^*$ ; if  $\delta < \delta^l$ , then  $\Delta^l < \Delta^a$ , and  $\Delta^l < k$  if  $k > 5r/(9\bar{N})$ .*

**Proof of Proposition B1:** The proof proceeds in four steps. First, by argument parallel to that in the proof of Lemma A2b,  $p^l < p^a$ . Second, let  $\delta^l = \min(\delta^L, \delta_2^l, \delta_3^l, \delta_4^l)$ , where  $\delta_j^l > 0$  for  $j \in \{2, 3, 4\}$  will be defined subsequently. Because  $\delta^l \leq \delta^L$ , if  $\delta < \delta^l$  and  $\Delta > \Delta^l$ , then  $p^* = p^l$  (from Lemma B2). Further  $p^l < p^a = p_I^*$ , where the inequality follows from step one and the equality

from Lemma B1. Third, suppose  $r/\bar{N} \leq k$ . This implies  $r/\bar{N} < K^h$ . Because  $p^a\lambda(V^h, p^a, \bar{N})$  is continuous in  $\delta$  and  $\lim_{\delta \rightarrow 0} p^a\lambda(V^h, p^a, \bar{N}) = r$ ,  $r/\bar{N} < K^h$  implies that there exists  $\delta_1^l > 0$  such that  $\delta < \delta_1^l$  implies  $p^a\lambda(V^h, p^a, \bar{N}) < K^h$ , which contradicts our assumption that the firm activates at least one agent under any realized  $(V, K)$  (from Lemma B1). We conclude that there exists  $\delta_2^l > 0$  such that  $\delta < \delta_2^l$  implies  $r/\bar{N} > k$ . Fourth, because  $\Delta^a$  and  $\Delta^l$  are continuous in  $\delta$  and  $\lim_{\delta \rightarrow 0} [\Delta^a - \Delta^l] = \max(r/\bar{N} - 2k, 2(r/\bar{N} - k)/3) > 0$  (from Lemma B2), there exists  $\delta_3^l > 0$  such that  $\delta < \delta_3^l$  implies  $\Delta^a > \Delta^l$ . Because  $\Delta^l$  is continuous in  $\delta$  and  $\lim_{\delta \rightarrow 0} \Delta^l = \min(k, (r/\bar{N} - k)/3) > 0$  (from Lemma B2), there exists  $\delta_4^l > 0$  such that  $\delta < \delta_4^l$  and  $k > 5r/(9\bar{N})$  imply  $\Delta^l < k$ . ■
